# Supplementary material for: Population genetic analysis of the DARC locus (Duffy) reveals adaptation from standing variation associated with malaria resistance in humans
Source: PLoS Genet. 2017 Mar 10;13(3):e1006560. doi: 10.1371/journal.pgen.1006560 (PMC5365118; doi:10.1371/journal.pgen.1006560)
Supplement: S13 Table — The summary statistics of the real FY*O data and the simulations from each of the five tested initial frequency models. The percentages represent the quantiles in the data (Ex. 50% is the median). (XLSX) [file pgen.1006560.s021.xlsx]

## Sheet: S13 Table
	pi	# segregating sites	Tajima's D	theta	Fay and Wu's H	iHH	# fixed	# singletons	# doubletons	# mutations with more than 2 copies	H1	H2	H12	H1H2	# unique haplotypes	final frequency of allele	Average EHH at 5kb ends	# singletons / # fixed
Real Data	1.168	14	-1.385	6.6897	-5.5216	3217.87	4985	5	2	8	0.569	0.018	0.7417	0.0316	12	1	0.67345	0.00100301
De novo model
2.5%	0.201197	10	-2.0769	0.217603	-4.28735	1103.44	4956	2	0	3	0.0423924	0.00145393	0.0565759	0.00180459	10	0	0	0.000401849
Mean	3.94848	30.1582	-0.78376	3.49246	0.456024	2091.01	4969.82	6.70943	3.25681	20.2169	0.125809	0.0424338	0.174568	0.539459	34.5594	0.0236749	0.0224761	0.0013504
50%	3.87615	31	-0.792811	3.06832	0.868995	2010.75	4969	6	3	20	0.0792776	0.0420365	0.121926	0.592588	35	0	0	0.00121114
97.5%	7.45595	44	0.470442	9.07573	3.14065	3754.99	4990	13	8	32	0.818947	0.073921	0.873635	0.826531	50	0	0	0.00261622
0.1% Model
2.5%	0.17987	7	-2.17294	0.0148687	-7.24016	1189.63	4958	2	0	2	0.0459647	0.000867258	0.0628507	0.00102539	8	0	0	0.00040024
Mean	3.31547	23.6727	-0.616294	3.70259	-0.38712	2553.88	4975.79	6.01476	2.63262	15.5607	0.255127	0.0518778	0.360585	0.400389	26.0736	0.471193	0.283494	0.0012093
50%	3.28773	24	-0.656304	3.2484	0.200174	2393.27	4976	6	2	16	0.156617	0.0456076	0.256096	0.43499	25	0.0909091	0.215787	0.00120434
97.5%	7.09292	42	1.28223	9.93075	2.8654	4399.37	4992	12	7	30	0.864198	0.138839	0.91154	0.802932	48	1	0.958777	0.00241692
1% Model
2.5%	1.46413	14	-1.62605	0.388452	-5.03637	1128.2	4958	2	0	8	0.0467809	0.021911	0.0641771	0.073855	15	0	0	0.000401123
Mean	3.96171	26.6951	-0.442411	3.71553	0.246178	2458.94	4972.38	6.16847	2.75678	18.6975	0.135231	0.0550446	0.213574	0.507203	30.169	0.700357	0.360555	0.00124091
50%	3.79703	26	-0.502767	3.29224	0.711172	2314.67	4973	6	2	18	0.108203	0.0505561	0.171972	0.541038	30	1	0.305214	0.00120627
97.5%	7.38208	41	1.07676	9.51926	3.02066	4473.84	4986	12	7	31	0.378843	0.110806	0.588817	0.806086	47	1	1	0.00241741
10% Model
2.5%	1.7205	18	-1.64189	0.37384	-4.31011	1136.65	4956	2	0	11	0.0408619	0.0255586	0.0543822	0.152988	21	0.171717	0.110341	0.000401768
Mean	4.14749	29.6725	-0.601288	3.60609	0.5414	2089.49	4969.33	6.48001	3.06132	21.1311	0.0909572	0.0458557	0.139848	0.577937	35.4063	0.83909	0.256261	0.0013043
50%	3.97975	29	-0.641008	3.19764	0.952982	2045.07	4970	6	3	21	0.0781043	0.0438986	0.118967	0.615194	35	1	0.232375	0.00120846
97.50%	7.51926	43	0.657126	9.17554	3.17408	3287.07	4981	12	7	33	0.220539	0.0775176	0.347109	0.830399	51	1	0.530842	0.00242033
25% Model
2.5%	1.73619	20	-1.66306	0.361687	-4.217	1109.08	4955	2	0	12	0.0392307	0.0249209	0.0519335	0.152831	22	0.419192	0.106188	0.000401929
Mean	4.1711	31.4321	-0.647007	3.5935	0.577597	2031.83	4968.57	6.60969	3.18557	21.6368	0.0870048	0.0441097	0.133162	0.582604	36.5547	0.906659	0.23774	0.0013306
50%	4.00295	31	-0.684038	3.18425	0.989181	1992.28	4969	6	3	21	0.0744822	0.0422661	0.113152	0.620178	36	1	0.215685	0.00120943
97.5%	7.53253	45	0.57768	9.1505	3.18925	3171.54	4980	12	8	33	0.214571	0.0739465	0.336397	0.835009	52	1	0.486491	0.00242229
